# Supplementary material
Source: ML conference proceedings conference paper supplement (https://openreview.net/forum?id=LPkcoml66W)

**a**

Star-like binary input

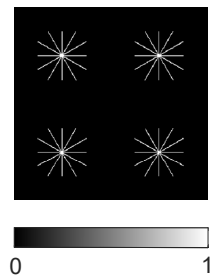**b**

Star-like shape saliency vs. complexity

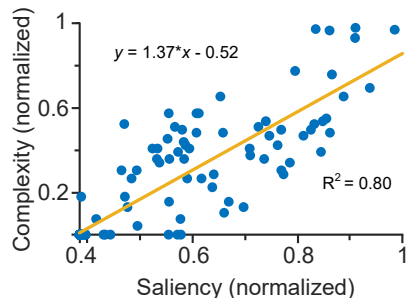**c**

Response to complexity of star-like shape

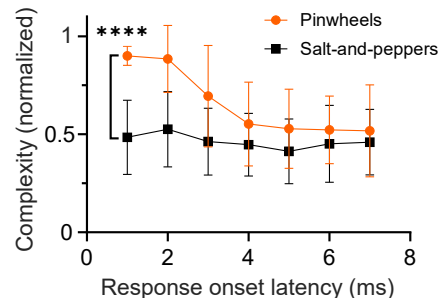

Star-like entropy map

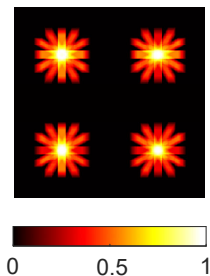**d**

Response to saliency of star-like shape

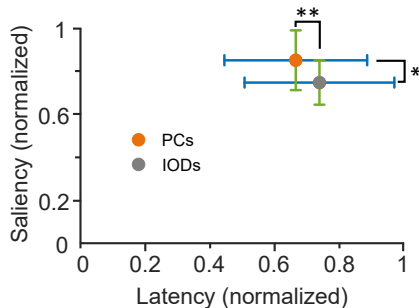**e**

Bimodal tuning within 2D cortical area

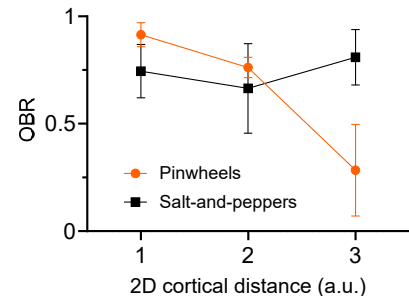

Supplement: supplementary_material [file attachment]
