# Supplementary material
Source: ML conference proceedings conference paper supplement (https://openreview.net/forum?id=LPkcoml66W)

$\max(\text{GE}) = 2.585$

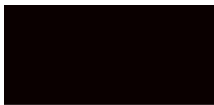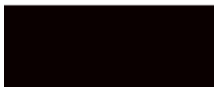

$\max(\text{GE}) = 5.602$

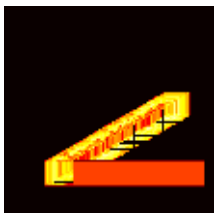

$\max(\text{GE}) = 4.250$

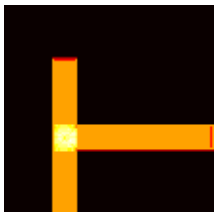

$\max(\text{GE}) = 2.585$

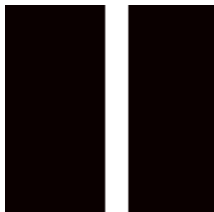

$\max(\text{GE}) = 5.599$

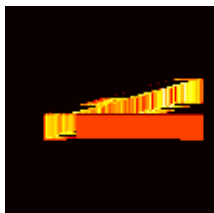

$\max(\text{GE}) = 4.882$

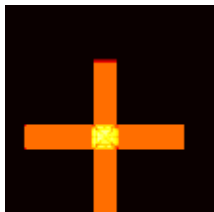

$\max(\text{GE}) = 5.653$

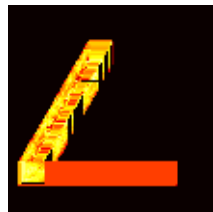

$\max(\text{GE}) = 4.507$

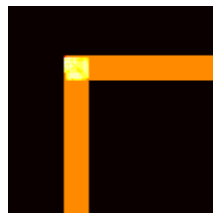

$\max(\text{GE}) = 6.043$

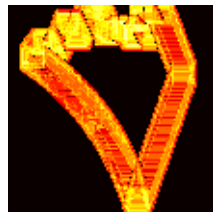

Supplement: supplementary_material [file attachment]
