# Supplementary material
Source: ML conference proceedings conference paper supplement (https://openreview.net/forum?id=LPkcoml66W)

a

## SESNN model

Image set:  
512×512×160

Batch size: 100

E- and I- recurrent  
connections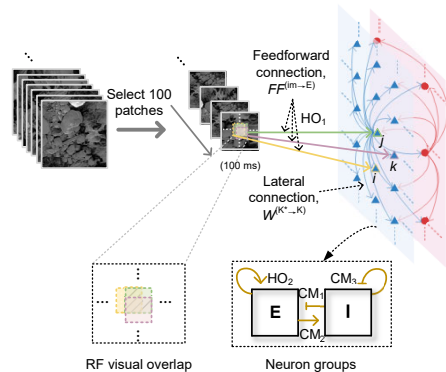

b

Periodic boundary  
condition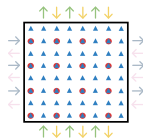

c

## Neural connectivity

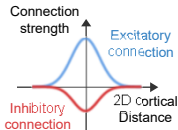

d

Post-training  
connection strengths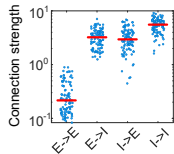

e

Single neuron RF  
emergence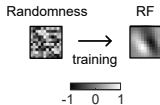

f

## Populational spatial self-organization

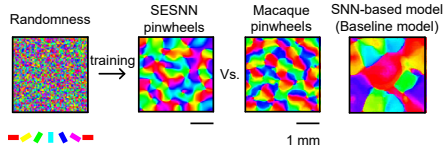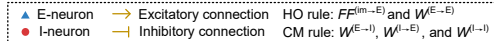

Supplement: supplementary_material [file attachment]
