# Supplementary material
Source: ML conference proceedings conference paper supplement (https://openreview.net/forum?id=LPkcoml66W)

**a**

BSDS500 image

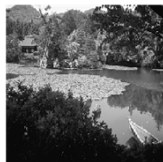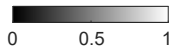

BSDS500 binary input

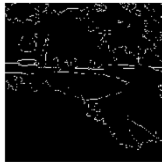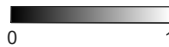**b**

BSDS500 saliency vs. complexity

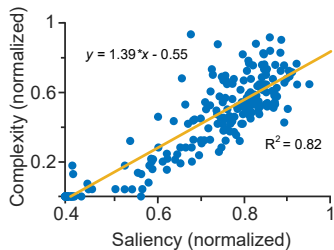

BSDS500 saliency map

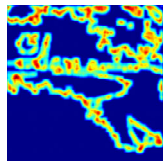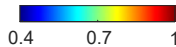

BSDS500 entropy map

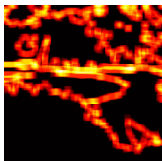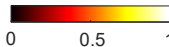**c**

Response to complexity of BSDS500

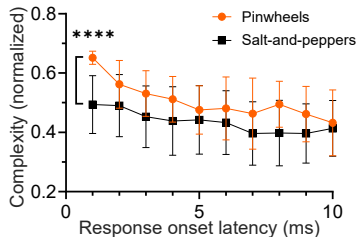

Supplement: supplementary_material [file attachment]
