# Supplementary material
Source: ML conference proceedings conference paper supplement (https://openreview.net/forum?id=LPkcoml66W)
Supplement: supplementary_material [file attachment]

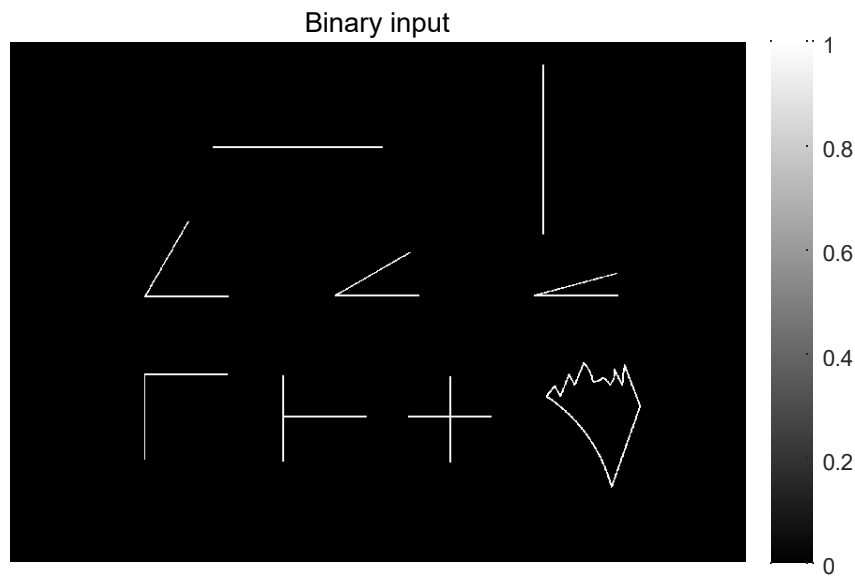

Fig. Various binary shapes (lines, angles, L-, T-, X- junctions, and jagged edges).

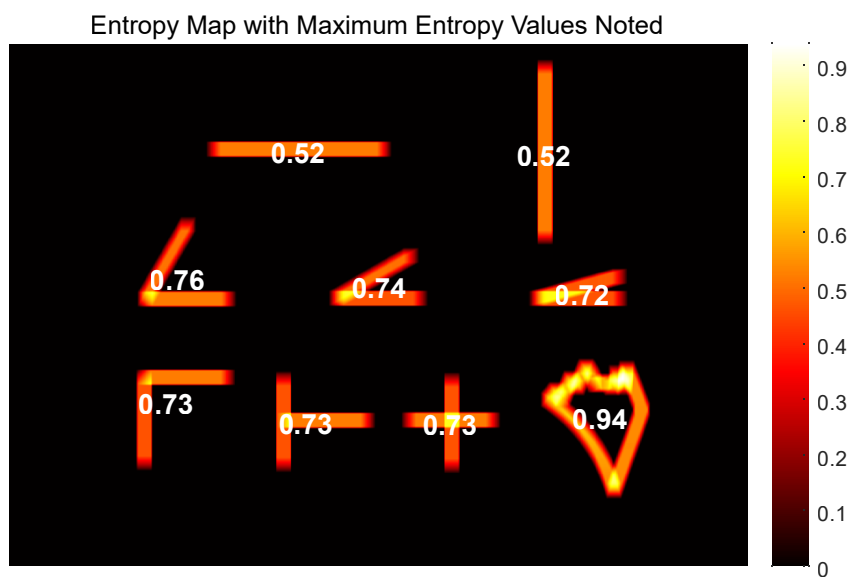

Fig. Maximum entropy for distinguishing shapes (lines, angles, L-, T-, X-junctions, and jagged edges) measured using local pixel entropy with sliding windows (LPESW).

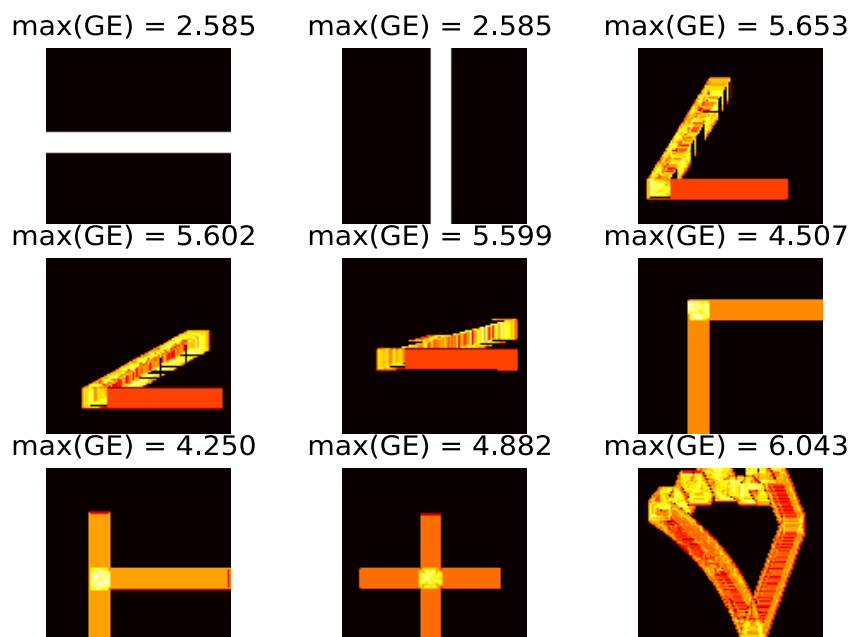

Fig. Maximum entropy for distinguishing shapes (lines, angles, L-, T-, X-junctions, and jagged edges) measured using local geometrical entropy (GE).
